# Supplementary material for: Transduction of inflammation from peripheral immune cells to the hippocampus induces neuronal hyperexcitability mediated by Caspase-1 activation
Source: Research Square preprint supplement (doi:10.21203/rs.3.rs-111417/v1), 2020-11-23
Supplement: Supplementary file 1 [file de54154958bc0451db965aa5.docx]

**Additional File 2:**

**Table S2.** Electrophysiological properties of pyramidal neurons in cortical layer II/III and hippocampal CA1 in all experimental groups.

|  | Group | RMP (mV) | Cm  (pF) | Rin  (MΩ) | Rheobase  (pA) | APR  (msec) | IA1  (pA) | ID1  (pA) |
| --- | --- | --- | --- | --- | --- | --- | --- | --- |
| Layer II/III | Naive OCHSCs | -65.28 ± 6.87  (n = 11) | 70.48 ± 13.54  (n = 11) | 140.35 ± 21.37  (n = 11) | 301.48 ± 119.33  (n = 11) | 2.07 ± 0.34  (n = 11) | 897.53 ± 87.52  (n = 11) | 256.25 ± 15.01  (n = 11) |
| Control PBMCs | -68.52 ± 6.15  (n =11) | 70.40 ± 11.78  (n = 11) | 144.50 ± 30.92  (n = 11) | 282.36 ± 68.85  (n = 11) | 2.18 ± 0.38  (n = 11) | 972.12 ± 129.91  (n = 11) | 226.92 ± 10.84  (n = 11) |
| LPS-PBMCs | -65.25 ± 5.16  (n = 10) | 73.04 ± 13.25  (n = 10) | 174.20 ± 24.87  (n = 10) | 268.21 ± 70.90  (n = 10) | 2.11 ± 0.43  (n = 10) | 791.12 ± 116.90  (n = 10) | 206.64 ± 24.01  (n = 10) |
| IR-PBMCs | -66.64 ± 6.75  (n = 10) | 75.85 ± 7.55  (n = 10) | 180.65 ± 26.00  (n = 10) | 175.20 ± 69.12  (n = 10) | 2.02 ± 0.45  (n = 10) | 515.81 ± 58.65  (n = 10) | 175.03 ± 23.88  (n = 10) |
| CA1 | Naive OCHSCs | -59.41 ± 3.47  (n = 23) | 100.1 ± 20.53  (n = 23) | 101.87 ± 9.07  (n = 23) | 261.77 ± 80.86  (n = 23) | 1.31 ± 0.16  (n = 15) | 928.82 ± 83.55  (n = 23) | 253.39 ± 21.49  (n = 23) |
| Control PBMCs | -59.73 ± 1.92  (n = 21) | 100.4 ± 28.84  (n = 21) | 101.87 ± 11.23  (n = 21) | 261.01 ± 46.13  (n = 21) | 1.29 ± 0.20  (n = 15) | 930.35 ± 145.81  (n = 21) | 229.38 ± 20.04  (n = 21) |
| LPS-PBMCs | -58.85 ± 3.00  (n = 19) | 90.69 ± 23.93  (n = 19) | 125.18 ± 11.60  (n = 19) | 194.92 ± 61.14  (n = 19) | 1.53 ± 0.20  (n = 15) | 648.57 ± 111.67  (n = 19) | 161.32 ± 15.81  (n = 19) |
| IR-PBMCs | -59.01 ± 2.49  (n = 20) | 95.03 ± 18.44  (n = 20) | 121.46 ± 11.41  (n = 20) | 191.96 ± 48.96  (n = 20) | 1.52 ± 0.20  (n = 15) | 617.99 ± 52.41  (n = 20) | 155.66 ± 15.74  (n = 20) |
| mCTL-PBMCs | -59.54 ± 2.72  (n = 11) | 98.17 ± 32.74  (n = 11) | 109.30 ± 12.98  (n = 11) | 212.63 ± 46.88  (n = 11) | 1.31 ± 0.14  (n = 11) | 1178.43 ± 119.61  (n = 6) | 254.20 ± 27.69  (n = 8) |
| mLPS-PBMCs | -58.38 ± 3.31  (n = 11) | 101.47 ± 17.96  (n =11) | 117.78 ± 15.50  (n = 11) | 192.86 ± 36.64  (n = 11) | 1.36 ± 0.17  (n = 11) | 1100.72 ± 45.87  (n = 5) | 280.10 ± 20.16  (n = 8) |
| mIR-PBMCs | -60.16 ± 4.18  (n = 10) | 108.63 ± 35.22  (n = 10) | 127.51 ± 9.64  (n = 10) | 155.55 ± 50.95  (n = 10) | 1.52 ± 0.20  (n = 10) | 855.10 ± 66.09  (n = 5) | 160.48 ± 25.92  (n = 7) |
| DMSO-LPS-PBMCs | -58.16 ± 2.40  (n = 9) | 82.15 ± 21.95  (n = 9) | 132.44 ± 20.12  (n = 9) | 173.29 ± 37.27  (n = 9) | 1.56 ± 0.20  (n = 9) | 747.64 ± 64.58  (n = 5) | 171.61 ± 11.41  (n = 7) |
| VX765-LPS-PBMCs | -58.29 ± 2.08  (n = 9) | 77.41 ± 14.66  (n = 9) | 104.20 ± 19.07  (n = 9) | 268.52 ± 79.76  (n = 9) | 1.32 ± 0.16  (n = 9) | 1080.72 ± 52.84  (n = 5) | 266.99 ± 43.55  (n = 8) |
| VX765-IR-PBMCs | -60.28 ± 3.24  (n = 9) | 81.60 ± 16.26  (n = 9) | 110.44 ± 13.91  (n = 9) | 281.13 ± 98.83  (n = 9) | 1.31 ± 0.17  (n = 9) | 983.24 ± 97.73  (n = 5) | 236.95 ± 34.51  (n = 8) |

APR: duration of action potential repolarization; Cm: cell membrane capacitance; IA: A-type fast activating, fast inactivating current; ID: D-type fast activating, slowly inactivating current; Rin: input resistance; RMP: resting membrane potential

n: number of neurons analyzed

1 current response at maximum voltage input, i.e. +20 mV.
